# Supplementary material for: Colon-available mango (poly)phenols exhibit mitigating effects on the intestinal barrier function in human intestinal cell monolayers under inflammatory conditions
Source: Royal Society of Chemistry journal article supplement (doi:10.1039/d4fo00451e), 2024-01-01
Supplement: d4fo00451e1.pdf [file d4fo00451e1.pdf]

## Supporting Information

### **Colon-available Mango (Poly)phenols Exhibit Mitigating Effects on the Intestinal Barrier Function in Human Intestinal Cell Monolayers Under Inflammatory Conditions**

Gema Pereira-Caro<sup>1,2\*</sup>, Salud Cáceres-Jiménez<sup>3</sup>, Alicia Moreno-Ortega<sup>1,2</sup>, Sara Dobani<sup>4,5</sup>, Kirsty Pourshahidi<sup>4</sup>, Chris I. R. Gill<sup>4</sup>, Pedro Mena<sup>5,6</sup>, Daniele Del Rio<sup>5,6</sup>, José Manuel Moreno-Rojas<sup>1,2</sup>, Giuseppe Taurino<sup>6</sup>, Ovidio Bussolati<sup>6,7</sup>, Tahani M. Almutairi<sup>8</sup>, Alan Crozier<sup>8,9</sup>, Massimiliano G. Bianchi<sup>6,7\*</sup>

<sup>1</sup>Department of Agroindustry and Food Quality, Andalusian Institute of Agricultural and Fisheries Research and Training (IFAPA), Alameda del Obispo, Córdoba, Spain

<sup>2</sup>Foods for Health Group, Instituto Maimónides de Investigación Biomédica de Córdoba (IMIBIC), Córdoba, Spain.

<sup>3</sup>Departamento de Bromatología y Tecnología de los Alimentos, Campus Rabanales, Ed. Darwin-anexo Universidad de Córdoba, Córdoba, Spain

<sup>4</sup>Nutrition Innovation Centre for Food and Health (NICHE), Ulster University, Coleraine, UK

<sup>5</sup>Human Nutrition Unit, Department of Food and Drug, University of Parma, Parma, Italy

<sup>6</sup>Microbiome Research Hub, University of Parma, Parma, Italy

<sup>7</sup>Laboratory of General Pathology, Department of Medicine and Surgery, University of Parma, Parma, Italy

<sup>8</sup>Department of Chemistry, King Saud University Riyadh, Saudi Arabia

<sup>9</sup>School of Medicine, Dentistry and Nursing, University of Glasgow, Glasgow, UK

\*Corresponding authors:

Dra. Gema Pereira-Caro ([mariag.pereira@juntadeandalucia.es](mailto:mariag.pereira@juntadeandalucia.es))

Dr. Massimiliano Bianchi ([massimiliano.bianchi@unipr.it](mailto:massimiliano.bianchi@unipr.it))

**Table S1.** Age of the six ileostomy participants in the study.

| <b>Volunteer ID</b> | <b>Age</b> |
|---------------------|------------|
| S02                 | 34         |
| S04                 | 65         |
| S05                 | 56         |
| S07                 | 42         |
| S08                 | 33         |
| S10                 | 53         |

**Table S2.** Primers used for studies of gene expression.

| Gene                    | Forward                                 | Reverse                              | T (°C)   | Amplicon Size (bp) | Amplification efficiency (%) |
|-------------------------|-----------------------------------------|--------------------------------------|----------|--------------------|------------------------------|
| Interleukin-8           | 5' ACT GAG AGT GAT TGA GAG TGG AC<br>3' | 5' AAC CCT CTG CAC CCA GTT TTC<br>3' | 59<br>°C | 127                | 105 ± 5                      |
| Nitric oxide synthase 2 | 5' TCT GTT CAA GAC CAA ATT CCA CC<br>3' | 5' CGG GGA CTC ATT CTG CTG C 3'      | 58<br>°C | 151                | 110 ± 8                      |
| Mucin 2                 | 5' GAG GGC AGA ACC CGA AAC C 3'         | 5' GGC GAA GTT GTA GTC GCA GAG<br>3' | 59<br>°C | 117                | 101 ± 5                      |
| Ribosomal Protein L15   | 5' GCA GCC ATC AGG TAA GCC AAG 3'       | 5' AGC GGA CCC TCA GAA GAA AGC<br>3' | 57<br>°C | 100                | 104 ± 5                      |

**Table S3.** (Poly)phenols presented in ileal fluid from six subjects pre- (0 h) and post-mango intake (4-8 h). Data is expressed in nmol as mean value  $\pm$  SD.

|                                                   | S02                           |                                  | S04                              |                               | S05                            |                               | S07                            |                                    | S08                              |                                 | S10                              |                                 |
|---------------------------------------------------|-------------------------------|----------------------------------|----------------------------------|-------------------------------|--------------------------------|-------------------------------|--------------------------------|------------------------------------|----------------------------------|---------------------------------|----------------------------------|---------------------------------|
|                                                   | 0 h                           | 4-8 h                            | 0 h                              | 4-8 h                         | 0 h                            | 4-8 h                         | 0 h                            | 4-8 h                              | 0 h                              | 4-8 h                           | 0 h                              | 4-8 h                           |
| <i>Cinnamic acids</i>                             |                               |                                  |                                  |                               |                                |                               |                                |                                    |                                  |                                 |                                  |                                 |
| 4'-Hydroxy-3'-methoxycinnamic acid                | 8 $\pm$ 0.2                   | 65 $\pm$ 0.3*                    | 865 $\pm$ 50                     | 37 $\pm$ 2                    | 257 $\pm$ 4                    | 41 $\pm$ 2                    | 339 $\pm$ 20                   | 15 $\pm$ 0.1                       | 135 $\pm$ 4                      | 16 $\pm$ 0.1                    | 118 $\pm$ 6                      | 122 $\pm$ 4                     |
| 3'-Methoxycinnamic acid- <i>O</i> -hexoside       | 12 $\pm$ 0.4                  | 3 $\pm$ 1                        | <LQ                              | <LQ                           | 96 $\pm$ 24                    | <LQ                           | 136 $\pm$ 3                    | 4 $\pm$ 0.3                        | <LQ                              | <LQ                             | 7 $\pm$ 2                        | 46 $\pm$ 2 *                    |
| 4'-Hydroxy-3',5'-dimethoxycinnamic acid           | 2.4 $\pm$ 0.1                 | 46 $\pm$ 1*                      | 165 $\pm$ 3                      | 11 $\pm$ 0.2                  | 116 $\pm$ 12                   | 119 $\pm$ 1                   | 35 $\pm$ 1                     | 3.7 $\pm$ 0.1                      | 74 $\pm$ 3                       | 188 $\pm$ 3 *                   | 44 $\pm$ 5                       | 368 $\pm$ 2 *                   |
| 3,5-dimethoxycinnamic acid hexoside 1             | 0.9 $\pm$ 0.1                 | <LQ                              | <LQ                              | <LQ                           | <LQ                            | <LQ                           | 0.9 $\pm$ 0.1                  | 9 $\pm$ 2 *                        | <LQ                              | <LQ                             | 2 $\pm$ 1                        | 15 $\pm$ 0 *                    |
| 3',4'-Dihydroxycinnamic acid                      | 16 $\pm$ 1                    | 5 $\pm$ 0.5                      | 118 $\pm$ 2                      | 26 $\pm$ 0.4                  | 2.8 $\pm$ 0.3                  | 2 $\pm$ 0.1                   | 11 $\pm$ 0.2                   | 3.5 $\pm$ 0.4                      | 82 $\pm$ 1                       | 16 $\pm$ 1                      | 38 $\pm$ 2                       | 9.1 $\pm$ 0.4                   |
| 3'-Methoxycinnamic acid-4'-glucuronide            | 13 $\pm$ 1                    | 9 $\pm$ 0.8                      | 247 $\pm$ 66                     | <LQ                           | <LQ                            | 6.7 $\pm$ 0.1*                | <LQ                            | 7.9 $\pm$ 0.3 *                    | <LQ                              | 17 $\pm$ 2 *                    | 5 $\pm$ 0.6                      | 11 $\pm$ 0.3 *                  |
| 4'-Hydroxycinnamic acid-3'-sulfate                | 67 $\pm$ 2                    | 10 $\pm$ 0.3                     | <LQ                              | 16 $\pm$ 0.4*                 | <LQ                            | 1.2 $\pm$ 0.1*                | <LQ                            | 15 $\pm$ 3 *                       | <LQ                              | 55 $\pm$ 0 *                    | 1.5 $\pm$ 0.1                    | 9.9 $\pm$ 0.3 *                 |
| 3'-Methoxycinnamic acid-4'-sulfate                | 1299 $\pm$ 49                 | 962 $\pm$ 119                    | 2027 $\pm$ 739                   | 731 $\pm$ 4                   | <LQ                            | 22 $\pm$ 0.7*                 | 1207 $\pm$ 136                 | 3068 $\pm$ 115 *                   | 4702 $\pm$ 498                   | 1926 $\pm$ 17                   | 2958 $\pm$ 363                   | 975 $\pm$ 25                    |
| <b>Total cinnamic acids</b>                       | <b>1418<math>\pm</math>54</b> | <b>1100 <math>\pm</math> 123</b> | <b>3422 <math>\pm</math> 860</b> | <b>821 <math>\pm</math> 7</b> | <b>472 <math>\pm</math> 40</b> | <b>192 <math>\pm</math> 4</b> | <b>1729<math>\pm</math>160</b> | <b>3126 <math>\pm</math> 121 *</b> | <b>4993 <math>\pm</math> 506</b> | <b>2218 <math>\pm</math> 23</b> | <b>3173 <math>\pm</math> 380</b> | <b>1555 <math>\pm</math> 34</b> |
| <i>Phenylpropanoic acids</i>                      |                               |                                  |                                  |                               |                                |                               |                                |                                    |                                  |                                 |                                  |                                 |
| 3-(4'-Hydroxy-3'-methoxyphenyl)propanoic acid     | 22 $\pm$ 1                    | <LQ                              | <LQ                              | 62 $\pm$ 1 *                  | 6089 $\pm$ 872                 | <LQ                           | <LQ                            | <LQ                                | <LQ                              | <LQ                             | <LQ                              | 16 $\pm$ 0.1                    |
| 3-(3'-Hydroxy-4'-methoxyphenyl)propanoic acid     | <LQ                           | <LQ                              | <LQ                              | 17 $\pm$ 0.4 *                | <LQ                            | 35 $\pm$ 1 *                  | <LQ                            | <LQ                                | <LQ                              | 14 $\pm$ 0.3                    | <LQ                              | 25 $\pm$ 2 *                    |
| 3-(3'-Hydroxyphenyl)propanoic acid-4'-glucuronide | 652 $\pm$ 12                  | 559 $\pm$ 39 *                   | <LQ                              | <LQ                           | <LQ                            | 57 $\pm$ 2 *                  | 104 $\pm$ 32                   | 379 $\pm$ 40 *                     | <LQ                              | 205 $\pm$ 4 *                   | <LQ                              | 286 $\pm$ 9 *                   |

|                                                          |                   |                   |                   |                   |                     |                 |                   |                   |                   |                   |                    |                    |
|----------------------------------------------------------|-------------------|-------------------|-------------------|-------------------|---------------------|-----------------|-------------------|-------------------|-------------------|-------------------|--------------------|--------------------|
| 3-(4'-Hydroxyphenyl)propanoic acid-3'-glucuronide        | 384 ± 35          | 547 ± 21          | 7961 ± 130        | 493 ± 29          | <LQ                 | 323 ± 15 *      | 527 ± 96          | 3402 ± 109 *      | <LQ               | 1146 ± 94 *       | <LQ                | 10735 ± 124        |
| 3-(4'-Methoxyphenyl)propanoic acid-3'-glucuronide        | 20 ± 1            | 32 ± 10           | 102 ± 1           | 99 ± 7            | 65 ± 4              | 48 ± 2          | 11 ± 4            | <LQ               | 111 ± 5           | <LQ               | 114 ± 14           | <LQ                |
| 3-(3'-Hydroxyphenyl)propanoic acid-4'-sulfate            | <LQ               | <LQ               | <LQ               | <LQ               | <LQ                 | 117 ± 12 *      | 194 ± 42          | 215 ± 50          | <LQ               | 511 ± 25 *        | <LQ                | 330 ± 30           |
| 3-(4'-Hydroxyphenyl)propanoic acid-3'-sulfate            | 2248 ± 143        | 629 ± 27          | <LQ               | 4630 ± 164 *      | 7139 ± 2740         | 73 ± 0.1        | 2391 ± 467        | 228 ± 20          | 2689 ± 545        | 636 ± 16          | 1601 ± 289         | <LQ                |
| <b>Total phenylpropanoic acids</b>                       | <b>3326 ± 192</b> | <b>1767 ± 97</b>  | <b>8063 ± 131</b> | <b>5301 ± 202</b> | <b>13293 ± 3615</b> | <b>653 ± 32</b> | <b>3227 ± 641</b> | <b>4224 ± 220</b> | <b>2800 ± 550</b> | <b>2512 ± 140</b> | <b>1715 ± 303</b>  | <b>11392 ± 165</b> |
| <i>Phenylacetic acids</i>                                |                   |                   |                   |                   |                     |                 |                   |                   |                   |                   |                    |                    |
| Phenylacetic acid                                        | 214 ± 2           | <LQ               | 1416 ± 10         | <LQ               | <LQ                 | <LQ             | <LQ               | <LQ               | 6123 ± 217        | <LQ               | 5734 ± 31          | <LQ                |
| 3'-Hydroxyphenylacetic acid-4'-sulfate                   | <LQ               | 1554 ± 15 *       | <LQ               | <LQ               | 415 ± 6             | 143 ± 1         | <LQ               | 902 ± 14 *        | <LQ               | 626 ± 9 *         | 2904 ± 51          | 1643 ± 15          |
| 3'-Methoxyphenylacetic acid-4'-sulfate                   | 1626 ± 156        | 530 ± 75          | <LQ               | <LQ               | <LQ                 | 144 ± 9 *       | 1562 ± 1          | 577 ± 136         | <LQ               | <LQ               | 1396 ± 313         | <LQ                |
| 4'-Methoxyphenylacetic acid-3'-sulfate                   | 206 ± 14          | 210 ± 56          | <LQ               | <LQ               | 115 ± 4             | 37 ± 1          | 150 ± 5           | 140 ± 30          | <LQ               | 176 ± 6 *         | 1167 ± 419         | 776 ± 93           |
| <b>Total phenylacetic acids</b>                          | <b>2046 ± 171</b> | <b>2294 ± 146</b> | <b>1416 ± 10</b>  | <b>&lt;LQ</b>     | <b>530 ± 10</b>     | <b>324 ± 11</b> | <b>1712 ± 6</b>   | <b>1619 ± 180</b> | <b>6123 ± 217</b> | <b>802 ± 15</b>   | <b>11201 ± 814</b> | <b>2419 ± 108</b>  |
| <i>Benzoic acids</i>                                     |                   |                   |                   |                   |                     |                 |                   |                   |                   |                   |                    |                    |
| 3,4,5-Trihydroxybenzoic acid                             | 1.6 ± 0.1         | 685 ± 31 *        | 13 ± 9            | 3052 ± 92 *       | 7.5 ± 0.4           | 2459 ± 79 *     | 15 ± 1            | 5592 ± 952 *      | <LQ               | 2562 ± 52 *       | 0.8 ± 0.1          | 1765 ± 200 *       |
| Trihydroxybenzoic acid                                   | <LQ               | <LQ               | 1.2 ± 0.1         | 160 ± 1 *         | 0.5 ± 0.1           | <LQ             | 0.8 ± 0.2         | 21 ± 3 *          | 2.8 ± 0.1         | <LQ               | <LQ                | <LQ                |
| 3,4-dihydroxy-5-(3,4,5-trihydroxybenzoyloxy)benzoic acid | <LQ               | 11 ± 2 *          | <LQ               | 4.3 ± 0.1 *       | <LQ                 | 3 ± 5 *         | <LQ               | 21 ± 1 *          | <LQ               | 34 ± 1 *          | <LQ                | 10 ± 1 *           |
| 3,5-Dihydroxy-4-methoxybenzoic acid                      | <LQ               | <LQ               | <LQ               | 4.8 ± 0.2 *       | <LQ                 | 46 ± 1 *        | <LQ               | <LQ               | <LQ               | <LQ               | <LQ                | <LQ                |
| Dihydroxybenzoic acid-sulfate 2                          | 0.1 ± 0.1         | 307 ± 7 *         | <LQ               | 42 ± 1 *          | <LQ                 | 71 ± 1 *        | <LQ               | 646 ± 17 *        | <LQ               | 196 ± 0.5 *       | <LQ                | 193 ± 1 *          |
| 3-Hydroxy-4-methoxybenzoic acid-5-sulfate                | <LQ               | <LQ               | <LQ               | 896 ± 17 *        | <LQ                 | 137 ± 2 *       | <LQ               | 2454 ± 28 *       | <LQ               | 467 ± 4 *         | <LQ                | 1336 ± 1261        |

|                                           |                 |                    |                   |                     |                   |                     |                 |                      |                   |                     |                   |                      |
|-------------------------------------------|-----------------|--------------------|-------------------|---------------------|-------------------|---------------------|-----------------|----------------------|-------------------|---------------------|-------------------|----------------------|
| 5-Hydroxy-3-methoxybenzoic acid-4-sulfate | <LQ             | 489 ± 5 *          | <LQ               | 23 ± 1 *            | <LQ               | 34 ± 0.4 *          | <LQ             | 271 ± 5 *            | <LQ               | 49 ± 2 *            | <LQ               | 60 ± 2 *             |
| 3,4-Dihydroxybenzoic acid                 | 28 ± 3          | <LQ                | 504 ± 47          | 918 ± 41 *          | <LQ               | 137 ± 14 *          | <LQ             | 403 ± 52 *           | 125 ± 5           | 1750 ± 19 *         | 202 ± 29          | 515 ± 56 *           |
| 4-Hydroxybenzoic acid                     | 11 ± 1          | <LQ                | 296 ± 6           | 53 ± 3              | 85 ± 3            | 86 ± 2              | 41 ± 1          | <LQ                  | <LQ               | <LQ                 | <LQ               | 58 ± 4 *             |
| Hydroxybenzoic acid-hexoside 1            | 71 ± 4          | 87 ± 13            | 42 ± 30           | 267 ± 17 *          | <LQ               | 3 ± 1               | 7 ± 5           | 245 ± 27 *           | 37 ± 3            | 638 ± 23 *          | <LQ               | 340 ± 64 *           |
| 3-Hydroxybenzoic acid-4-sulfate           | 64 ± 7          | <LQ                | 50 ± 17           | <LQ                 | <LQ               | <LQ                 | <LQ             | 254 ± 8 *            | <LQ               | 556 ± 13 *          | 1116 ± 59         | 380 ± 27 *           |
| <b>Total benzoic acids</b>                | <b>176 ± 15</b> | <b>1579 ± 59 *</b> | <b>906 ± 109</b>  | <b>5420 ± 173 *</b> | <b>93 ± 3</b>     | <b>2976 ± 105 *</b> | <b>64 ± 7</b>   | <b>9653 ± 1093 *</b> | <b>165 ± 9</b>    | <b>6252 ± 114 *</b> | <b>1319 ± 88</b>  | <b>4657 ± 1613 *</b> |
| <i>Hydroxybenzenes</i>                    |                 |                    |                   |                     |                   |                     |                 |                      |                   |                     |                   |                      |
| 1,2,3-Trihydroxybenzene                   | 7.6 ± 0.1       | 61 ± 0.6 *         | 33 ± 10           | 352 ± 33 *          | 24 ± 6            | 495 ± 27 *          | 4.4 ± 0.2       | 45 ± 1 *             | <LQ               | 132 ± 7 *           | 34 ± 3            | 12 ± 6               |
| Methylbenzene-sulfate 1                   | 0.3 ± 0.1       | <LQ                | 1.6 ± 0.2         | <LQ                 | <LQ               | <LQ                 | 4.8 ± 1         | <LQ                  | 6.4 ± 0.3         | <LQ                 | <LQ               | <LQ                  |
| Methylbenzene-sulfate 2                   | 13 ± 0.2        | 60 ± 0.1 *         | 14 ± 8            | 0.3 ± 0.1           | <LQ               | <LQ                 | 26 ± 4          | 1.6 ± 0.1            | 110 ± 2           | 1.1 ± 0.1           | 131 ± 1           | 11 ± 0.1             |
| Dihydroxybenzene-sulfate 3                | <LQ             | 1.8 ± 0.4          | <LQ               | 22 ± 1              | <LQ               | 91 ± 1              | <LQ             | 4 ± 3                | <LQ               | 46 ± 1              | <LQ               | 22 ± 0.1             |
| Hydroxy-methylbenzene-sulfate 1           | 6.3 ± 0.1       | 9.5 ± 0.2 *        | <LQ               | 2.6 ± 0.2 *         | 8.2 ± 0.5         | <LQ                 | <LQ             | 3.6 ± 0.1 *          | 0.8 ± 0.1         | 74 ± 8              | 92 ± 1            | 6 ± 2                |
| Hydroxy-methylbenzene-sulfate 2           | <LQ             | 11 ± 0.5 *         | <LQ               | 0.7 ± 0.1 *         | 4.4 ± 0.1         | 0.7 ± 0.1           | <LQ             | 2 ± 0.1 *            | <LQ               | 82 ± 8              | 5.7 ± 0.1         | 28 ± 4               |
| <b>Total hydroxybenzenes</b>              | <b>27 ± 0.4</b> | <b>143 ± 2 *</b>   | <b>49 ± 19</b>    | <b>378 ± 34 *</b>   | <b>37 ± 6</b>     | <b>587 ± 28 *</b>   | <b>35 ± 5</b>   | <b>56 ± 4 *</b>      | <b>117 ± 3</b>    | <b>335 ± 25</b>     | <b>263 ± 5</b>    | <b>79 ± 12</b>       |
| <i>Galloyl derivatives</i>                |                 |                    |                   |                     |                   |                     |                 |                      |                   |                     |                   |                      |
| Mono-galloyl-glucoside 1                  | <LQ             | 6 ± 4              | <LQ               | 9 ± 0.2 *           | <LQ               | 16 ± 0.1 *          | <LQ             | 68 ± 1 *             | <LQ               | 6.1 ± 0.1 *         | <LQ               | <LQ                  |
| Mono-galloyl-glucoside 2                  | <LQ             | 1.9 ± 0.9          | <LQ               | <LQ                 | <LQ               | <LQ                 | <LQ             | 5.3 ± 0.3 *          | <LQ               | 8 ± 0.5 *           | <LQ               | 32 ± 1 *             |
| Tetra-galloyl-glucoside 1                 | <LQ             | 0.1 ± 0.1          | <LQ               | 0.7 ± 0.1 *         | <LQ               | 0.4 ± 0.1 *         | <LQ             | 4.4 ± 0.2 *          | <LQ               | 3.4 ± 0.2 *         | <LQ               | 0.4 ± 0.1 *          |
| Tetra-galloyl-glucoside 2                 | <LQ             | 6 ± 1              | <LQ               | 3.8 ± 0.3 *         | <LQ               | 1.8 ± 0.2 *         | <LQ             | 15 ± 2 *             | <LQ               | 9.2 ± 0.1 *         | <LQ               | 1.3 ± 0.1 *          |
| Penta-galloyl-glucoside                   | <LQ             | 1.5 ± 0.3 *        | <LQ               | 3.9 ± 0.4 *         | <LQ               | 1.9 ± 0.1 *         | <LQ             | 14 ± 0.3 *           | <LQ               | 5.3 ± 0.2 *         | <LQ               | 1.8 ± 0.1 *          |
| <b>Total galloyl derivatives</b>          | <b>&lt;LQ</b>   | <b>15 ± 8 *</b>    | <b>&lt;LQ</b>     | <b>17 ± 1 *</b>     | <b>&lt;LQ</b>     | <b>20 ± 0.5 *</b>   | <b>&lt;LQ</b>   | <b>106 ± 5 *</b>     | <b>&lt;LQ</b>     | <b>31.9 ± 1 *</b>   | <b>&lt;LQ</b>     | <b>36 ± 1.5 *</b>    |
| <b>Total (poly)phenols</b>                | <b>6993±432</b> | <b>6798±435</b>    | <b>13856±1129</b> | <b>11937±417</b>    | <b>14425±3674</b> | <b>4752±180</b>     | <b>6867±819</b> | <b>18784±1623 *</b>  | <b>14198±1285</b> | <b>12151±318</b>    | <b>17671±1590</b> | <b>20138±1933</b>    |

S02 is volunteer 2; S04 is volunteer 4; S05 is volunteer 5; S07 is volunteer 7; S08 is volunteer 8; and S10 is volunteer 10.

\* 4-8 h post-mango intake was significantly higher than pre-mango intake (p < 0.05)

**Table S4.** UHPLC–HRMS based identifications of (poly)phenols compounds and related compounds in ileal fluid collected 0 and 4-8 h after mango puree consumption. RT, retention time; [M-H]- Exp, experimental exact mass;  $\Delta$ , mass error.

| RT (min)                     | Compounds                                         | Chemical Structure                              | [M-H]- Exp. (m/z) | $\Delta$ (ppm) | MSIMI <sup>a</sup> | Quantified as                                     |
|------------------------------|---------------------------------------------------|-------------------------------------------------|-------------------|----------------|--------------------|---------------------------------------------------|
| <i>Cinnamic acids</i>        |                                                   |                                                 |                   |                |                    |                                                   |
| 11.5                         | 4'-Hydroxy-3'-methoxycinnamic acid                | C <sub>10</sub> H <sub>9</sub> O <sub>4</sub>   | 193.0495          | 2.72           | 1                  | Standard                                          |
| 8.6                          | 3'-Methoxycinnamic acid- <i>O</i> -hexoside       | C <sub>16</sub> H <sub>19</sub> O <sub>9</sub>  | 355.1023          | 1.98           | 2                  | 4'-Hydroxy-3'-methoxycinnamic acid                |
| 9.4                          | 3',4'-Dihydroxycinnamic acid                      | C <sub>9</sub> H <sub>7</sub> O <sub>4</sub>    | 179.0338          | -0.59          | 1                  | Standard                                          |
| 11.5                         | 4'-Hydroxy-3',5'-dimethoxycinnamic acid           | C <sub>11</sub> H <sub>11</sub> O <sub>5</sub>  | 223.0600          | -0.05          | 1                  | Standard                                          |
| 8.6                          | 3,5-Dimethoxycinnamic acid hexoside 1             | C <sub>17</sub> H <sub>21</sub> O <sub>10</sub> | 385.1129          | 2.58           | 2                  | 4'-Hydroxy-3',5'- dimethoxycinnamic acid          |
| 8.6                          | 3'-Methoxycinnamic acid-4'-glucuronide            | C <sub>16</sub> H <sub>17</sub> O <sub>10</sub> | 369.0816          | 2.76           | 1                  | Standard                                          |
| 8.8                          | 4'-Hydroxycinnamic acid-3'-sulfate                | C <sub>9</sub> H <sub>7</sub> O <sub>7</sub> S  | 258.9907          | 1.40           | 2                  | 3'-Methoxycinnamic acid-4'-sulfate                |
| 9.0                          | 3'-Methoxycinnamic acid-4'-sulfate                | C <sub>10</sub> H <sub>9</sub> O <sub>7</sub> S | 273.0063          | 1.66           | 1                  | Standard                                          |
| <i>Phenylpropanoic acids</i> |                                                   |                                                 |                   |                |                    |                                                   |
| 11.1                         | 3-(4'-Hydroxy-3'-methoxyphenyl)propanoic acid     | C <sub>10</sub> H <sub>11</sub> O <sub>4</sub>  | 195.0652          | 3.46           | 1                  | Standard                                          |
| 11.6                         | 3-(3'-Hydroxy-4'-methoxyphenyl)propanoic acid     | C <sub>10</sub> H <sub>11</sub> O <sub>4</sub>  | 195.0652          | -1.30          | 1                  | Standard                                          |
| 7.1                          | 3-(3'-Hydroxyphenyl)propanoic acid-4'-glucuronide | C <sub>15</sub> H <sub>17</sub> O <sub>10</sub> | 357.0816          | 3.10           | 2                  | 3-(4'-Methoxyphenyl)propanoic acid-3'-glucuronide |
| 8.1                          | 3-(4'-Hydroxyphenyl)propanoic acid-3'-glucuronide | C <sub>15</sub> H <sub>17</sub> O <sub>10</sub> | 357.0816          | 2.60           | 2                  | 3-(4'-Methoxyphenyl)propanoic acid-3'-glucuronide |

|     |                                                   |                                                 |          |      |   |                                               |
|-----|---------------------------------------------------|-------------------------------------------------|----------|------|---|-----------------------------------------------|
| 9.7 | 3-(4'-Methoxyphenyl)propanoic acid-3'-glucuronide | C <sub>16</sub> H <sub>19</sub> O <sub>10</sub> | 371.0973 | 1.61 | 1 | Standard                                      |
| 7.9 | 3-(3'-Hydroxyphenyl)propanoic acid-4'-sulfate     | C <sub>9</sub> H <sub>9</sub> O <sub>7</sub> S  | 261.0063 | 1.27 | 2 | 3-(4'-Hydroxyphenyl)propanoic acid-3'-sulfate |
| 8.4 | 3-(4'-Hydroxyphenyl)propanoic acid-3'-sulfate     | C <sub>9</sub> H <sub>9</sub> O <sub>7</sub> S  | 261.0063 | 1.62 | 1 | Standard                                      |

*Phenylacetic acids*

|     |                                        |                                                |          |       |   |                                               |
|-----|----------------------------------------|------------------------------------------------|----------|-------|---|-----------------------------------------------|
| 9.4 | Phenylacetic acid                      | C <sub>8</sub> H <sub>7</sub> O <sub>2</sub>   | 135.0440 | -0.71 | 1 | Standard                                      |
| 7.3 | 3'-Hydroxyphenylacetic acid-4'-sulfate | C <sub>8</sub> H <sub>7</sub> O <sub>6</sub> S | 230.9957 | 0.03  | 2 | 3-(4'-Hydroxyphenyl)propanoic acid-3'-sulfate |
| 6.6 | 3'-Methoxyphenylacetic acid-4'-sulfate | C <sub>9</sub> H <sub>9</sub> O <sub>7</sub> S | 261.0063 | 1.39  | 2 | 3-(4'-Hydroxyphenyl)propanoic acid-3'-sulfate |
| 7.3 | 4'-Methoxyphenylacetic acid-3'-sulfate | C <sub>9</sub> H <sub>9</sub> O <sub>7</sub> S | 261.0063 | 1.50  | 2 | 3-(4'-Hydroxyphenyl)propanoic acid-3'-sulfate |

*Benzoic acids*

|     |                                                          |                                                |          |       |   |                                           |
|-----|----------------------------------------------------------|------------------------------------------------|----------|-------|---|-------------------------------------------|
| 3.2 | 3,4,5-Trihydroxybenzoic acid                             | C <sub>7</sub> H <sub>5</sub> O <sub>5</sub>   | 169.0131 | -0.40 | 1 | Standard                                  |
| 2.4 | Trihydroxybenzoic acid                                   | C <sub>7</sub> H <sub>5</sub> O <sub>5</sub>   | 169.0131 | 0.49  | 2 | 3,4,5-Trihydroxybenzoic acid              |
| 8.7 | 3,4-Dihydroxy-5-(3,4,5-trihydroxybenzoyloxy)benzoic acid | C <sub>14</sub> H <sub>9</sub> O <sub>9</sub>  | 321.0241 | 1.10  | 2 | 3,4,5-Trihydroxybenzoic acid              |
| 4.5 | Dihydroxybenzoic acid-sulfate 2                          | C <sub>7</sub> H <sub>5</sub> O <sub>8</sub> S | 248.9705 | 0.75  | 2 | 3-Hydroxy-4-methoxybenzoic acid-5-sulfate |
| 8.0 | 3,5-Dihydroxy-4-methoxybenzoic acid                      | C <sub>8</sub> H <sub>7</sub> O <sub>5</sub>   | 183.0287 | 0.44  | 1 | Standard                                  |
| 8.4 | 4-Hydroxybenzoic acid                                    | C <sub>7</sub> H <sub>5</sub> O <sub>3</sub>   | 137.0233 | -0.66 | 1 | Standard                                  |
| 6.7 | 3,4-Dihydroxybenzoic acid                                | C <sub>7</sub> H <sub>5</sub> O <sub>4</sub>   | 153.0182 | 0.29  | 1 | Standard                                  |
| 4.5 | 3-Hydroxybenzoic acid-4-sulfate                          | C <sub>7</sub> H <sub>5</sub> O <sub>7</sub> S | 232.975  | 0.78  | 2 | 3-Hydroxy-4-methoxybenzoic acid-5-sulfate |
| 6.9 | 3-Hydroxy-4-methoxybenzoic acid-5-sulfate                | C <sub>8</sub> H <sub>7</sub> O <sub>8</sub> S | 262.9856 | 2.27  | 1 | Standard                                  |
| 7.2 | 5-Hydroxy-3-methoxybenzoic acid-4-sulfate                | C <sub>8</sub> H <sub>7</sub> O <sub>8</sub> S | 262.9856 | 1.32  | 2 | 3-Hydroxy-4-methoxybenzoic acid-5-sulfate |
| 4.7 | Hydroxybenzoic acid hexoside 1                           | C <sub>13</sub> H <sub>15</sub> O <sub>8</sub> | 299.0767 | 3.76  | 2 | 3,4-Dihydroxybenzoic acid                 |

*Hydroxybenzenes*



|                            |                                 |                                                 |          |       |   |                            |
|----------------------------|---------------------------------|-------------------------------------------------|----------|-------|---|----------------------------|
| 3.5                        | 1,2,3-Trihydroxybenzene         | C <sub>6</sub> H <sub>5</sub> O <sub>3</sub>    | 125.0233 | -2.72 | 1 | Standard                   |
| 8.2                        | Methylbenzene-sulfate 1         | C <sub>7</sub> H <sub>7</sub> O <sub>5</sub> S  | 203.0002 | 3.00  | 2 | 1-hydroxybenzene-2-sulfate |
| 9.4                        | Methylbenzene-sulfate 2         | C <sub>7</sub> H <sub>7</sub> O <sub>5</sub> S  | 203.0002 | 1.97  | 2 | 1-hydroxybenzene-2-sulfate |
| 4.9                        | Dihydroxybenzene-sulfate 3      | C <sub>6</sub> H <sub>5</sub> O <sub>6</sub> S  | 204.9801 | -0.07 | 2 | 1-hydroxybenzene-2-sulfate |
| 3.4                        | Hydroxy-methylbenzene-sulfate 1 | C <sub>7</sub> H <sub>7</sub> O <sub>6</sub> S  | 218.9957 | 2.17  | 2 | 1-hydroxybenzene-2-sulfate |
| 4.2                        | Hydroxy-methylbenzene-sulfate 2 | C <sub>7</sub> H <sub>7</sub> O <sub>6</sub> S  | 218.9957 | 2.85  | 2 | 1-hydroxybenzene-2-sulfate |
| <i>Galloyl derivatives</i> |                                 |                                                 |          |       |   |                            |
| 2.6                        | Mono-galloyl glucoside 1        | C <sub>13</sub> H <sub>15</sub> O <sub>10</sub> | 331.0659 | 1.27  | 2 | Penta-galloyl glucoside    |
| 6.6                        | Mono-galloyl glucoside 2        | C <sub>13</sub> H <sub>15</sub> O <sub>10</sub> | 331.0659 | 1.31  | 2 | Penta-galloyl glucoside    |
| 9.9                        | Tetra-galloyl glucoside 1       | C <sub>34</sub> H <sub>27</sub> O <sub>22</sub> | 787.0994 | 2.04  | 2 | Penta-galloyl glucoside    |
| 10.7                       | Tetra-galloyl glucoside 2       | C <sub>34</sub> H <sub>27</sub> O <sub>22</sub> | 787.0994 | 2.04  | 2 | Penta-galloyl glucoside    |
| 11.2                       | Penta-galloyl glucoside         | C <sub>41</sub> H <sub>31</sub> O <sub>26</sub> | 939.1098 | 1.87  | 1 | Standard                   |

<sup>a</sup> Metabolite Standards Initiative Metabolite Identification (MSIMI) levels (Sumner *et al.*, 2007). Reference compounds were available for all compounds identified at MSIMI level 1.

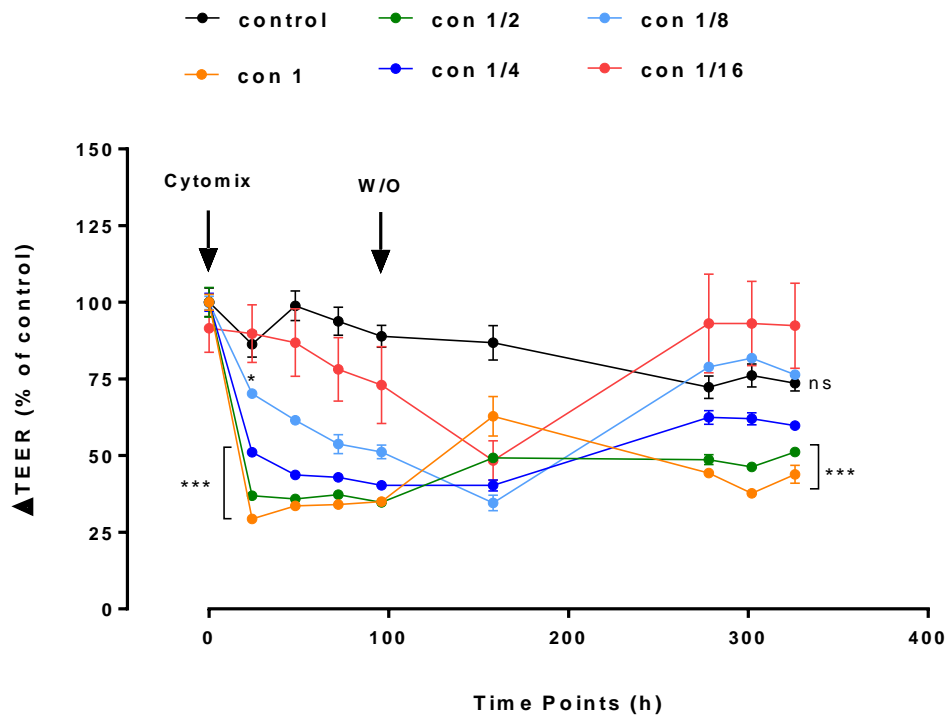

**Figure S1.** Effect of cytomix on trans epithelial electric resistance (TEER) in polarized Caco-2/HT29-MTX co-culture. After 21 days of culture in trans well insert, serial dilutions of the concentration 1 (TNF- $\alpha$  100 ng/mL, IFN- $\gamma$  50 ng/mL, LPS 10  $\mu$ g/mL) of the cytomix mixture in DMEM were tested to monitor the minimal effective doses on the epithelial barrier function. After 96 h of incubation, the basolateral medium was replaced with fresh medium w/o cytomix. TEER was determined every 24 h and expressed as changes relative to cells cultured in the absence of cytomix (Control). Two-way ANOVA with a Bonferroni's multiple comparisons; \*  $p < 0.05$ , \*\*\* $p < 0.001$  vs control at the same time point.



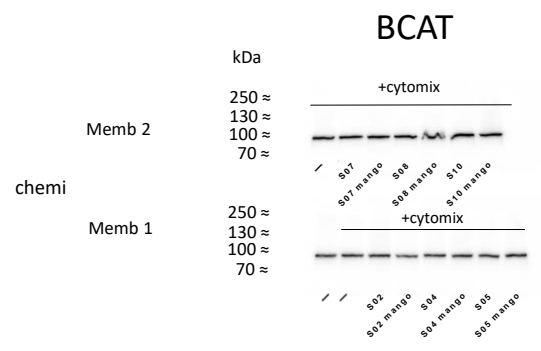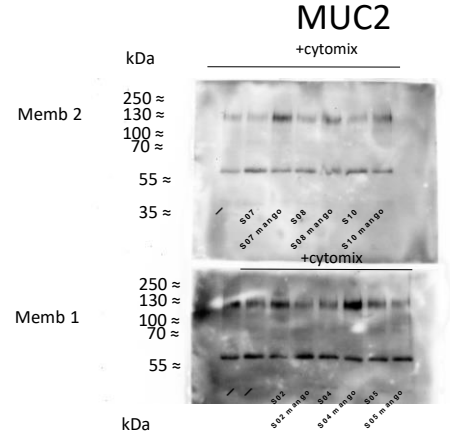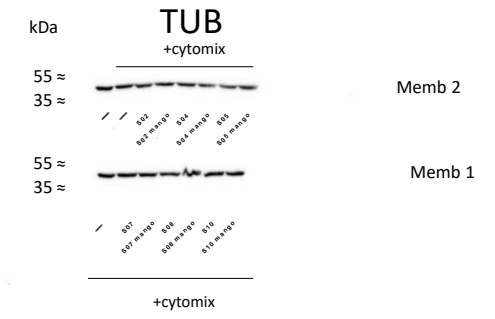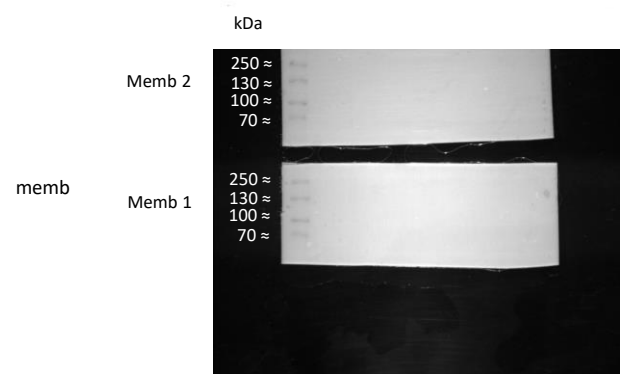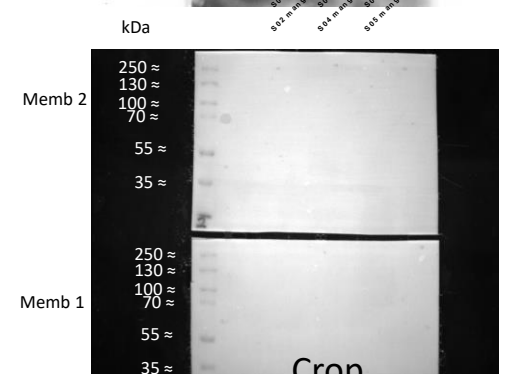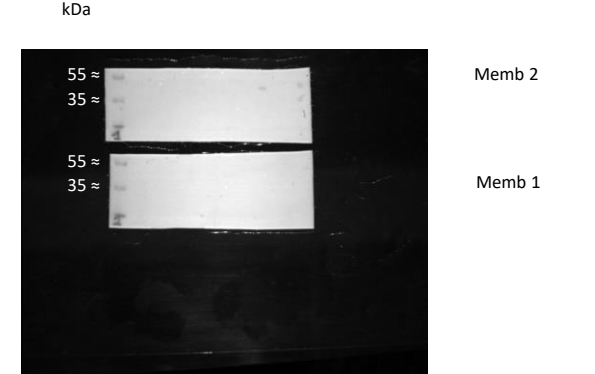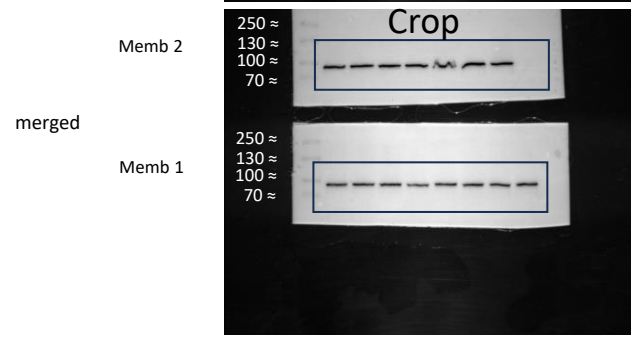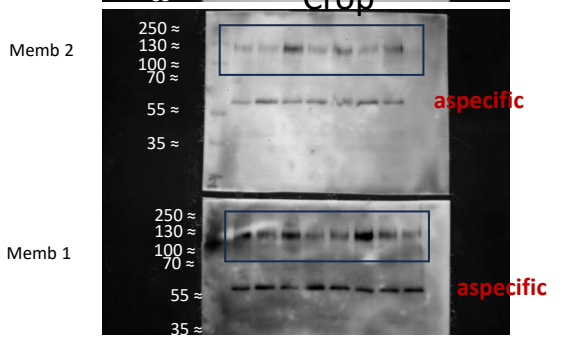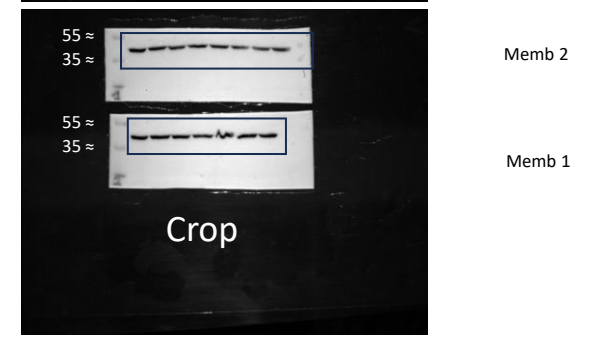

**Figure S2.** MUC2 and BCAT expression profile in Caco-2/HT29 monolayers. The images report the original results concerning the expression of BCAT, MUC2 and that of the housekeeping Tubulin. In upper, middle and bottom panels line are reported chemiluminescence, acquisition of membranes with white light and both merged signals, respectively. The exposure times for chemiluminescence were automatically selected by the iBright FL1500 automated system software (Life Technology, Thermo Fisher, Milan, Italy) to avoid saturation of the signals. For the complete description of the protocol followed see M&M.
